# Supplementary material
Source: PubMed Central journal article supplement (PMC9710201)
Supplement: NIHMS1817912-supplement-fS2.pdf [file NIHMS1817912-supplement-fS2.pdf]

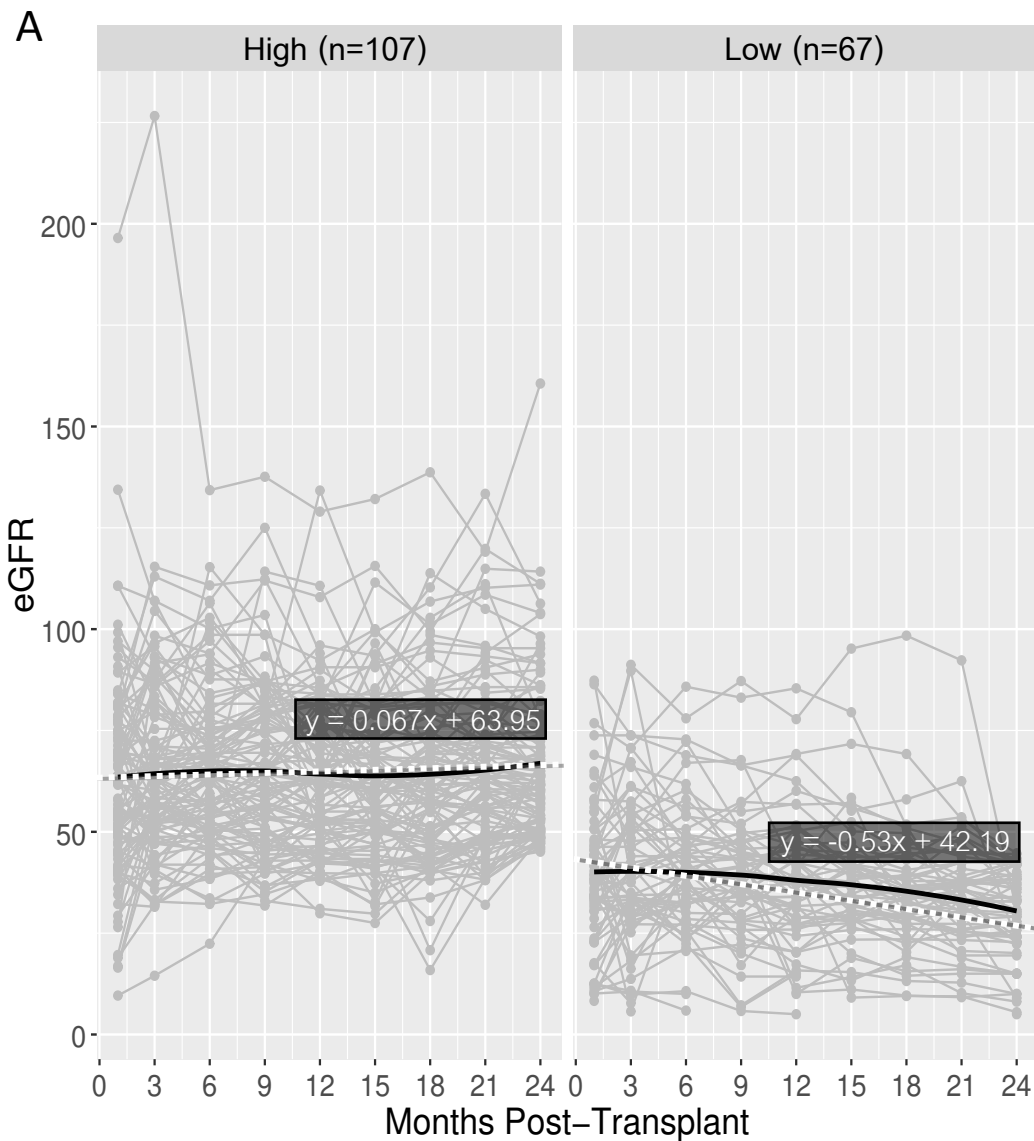

**B**

| eGFR timepoint | High (n=107) | Low (n=67)   | p-value |
|----------------|--------------|--------------|---------|
| 1 month        | 62.49 ±25.40 | 39.52 ±18.30 | <0.001  |
| 3 months       | 65.43 ±25.30 | 40.73 ±18.79 | <0.001  |
| 6 months       | 65.45 ±19.80 | 40.79 ±15.74 | <0.001  |
| 9 months       | 65.85 ±20.80 | 39.30 ±15.91 | <0.001  |
| 12 months      | 64.06 ±19.45 | 37.25 ±16.35 | <0.001  |
| 15 months      | 63.24 ±19.63 | 37.63 ±15.39 | <0.001  |
| 18 months      | 63.66 ±20.78 | 35.21 ±14.36 | <0.001  |
| 21 months      | 66.18 ±20.52 | 34.23 ±13.98 | <0.001  |
| 24 months      | 66.56 ±19.30 | 29.89 ±11.19 | <0.001  |
