# Supplementary material
Source: PubMed Central journal article supplement (PMC9710201)
Supplement: NIHMS1817912-supplement-fS5.pdf [file NIHMS1817912-supplement-fS5.pdf]

# Downregulated protein-protein interactions

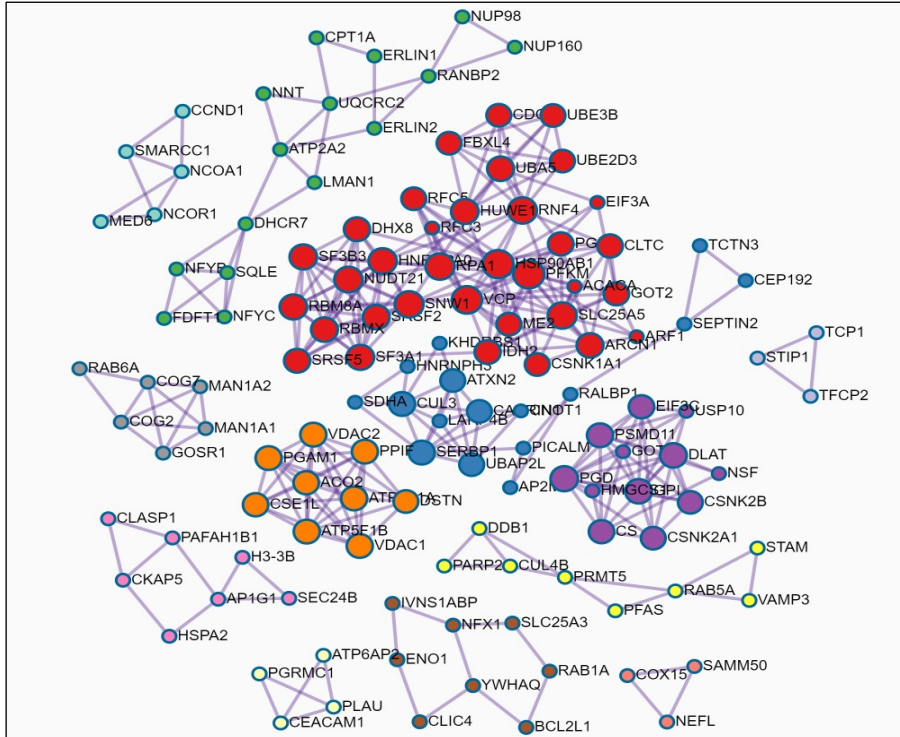

| MCODE subcluster | Downregulated GO Pathways                                         | Log <sub>10</sub> P |
|------------------|-------------------------------------------------------------------|---------------------|
| MCODE 1          | mRNA splicing –Major Pathway                                      | -12.4               |
|                  | mRNA splicing                                                     | -12.2               |
|                  | Spliceosome                                                       | -11.5               |
| MCODE 2          | Regulation of cellular amide metabolic process                    | -6.7                |
|                  | Regulation of translation                                         | -6.6                |
|                  | Vesicle budding from membrane                                     | -6.4                |
| MCODE 3          | Activation of gene expression by SREBF (SREBP)                    | -10.9               |
|                  | Regulation of cholesterol biosynthesis by SREBP (SREBF)           | -10.3               |
|                  | Cholesterol metabolic process                                     | -8.6                |
| MCODE 4          | Carbon metabolism                                                 | -9.2                |
|                  | Carbohydrate metabolic process                                    | -6.2                |
|                  | Glycolysis and gluconeogenesis                                    | -6.2                |
| MCODE 5          | Diabetic cardiomyopathy                                           | -8.8                |
|                  | Mitochondrial protein import                                      | -8.6                |
|                  | Chemical carcinogenesis – reactive oxygen species                 | -8.6                |
| MCODE 6          | DNA damage recognition in GG-NER                                  | -6.9                |
|                  | Dual incision complex in GG-NER                                   | -6.9                |
|                  | Formation of incision complex in GG-NER                           | -6.8                |
| MCODE 7          | Negative regulation of intrinsic apoptotic signaling              | -6.7                |
|                  | Regulation of intrinsic apoptotic signaling                       | -6.0                |
|                  | Negative regulation of apoptotic signaling                        | -4.6                |
| MCODE 8          | Cell cycle                                                        | -6.9                |
|                  | Loss of Nlp from mitotic centrosomes                              | -6.4                |
|                  | Loss of proteins required for interphase microtubule organization | -6.4                |
| MCODE 9          | Intra-Golgi traffic                                               | -13.5               |
|                  | Intra-Golgi and retrograde Golgi-to-ER traffic                    | -13.1               |
|                  | Intra-Golgi vesicle mediated transport                            | -10.7               |
| MCODE 10         | Chromatin organization                                            | -7.5                |
|                  | Chromatin modifying enzymes                                       | -7.5                |
|                  | PID ERA genomic pathway                                           | -7.0                |
