# Supplementary material
Source: PubMed Central journal article supplement (PMC9710201)
Supplement: NIHMS1817912-supplement-fS6.pdf [file NIHMS1817912-supplement-fS6.pdf]

## Upregulated protein-protein interactions

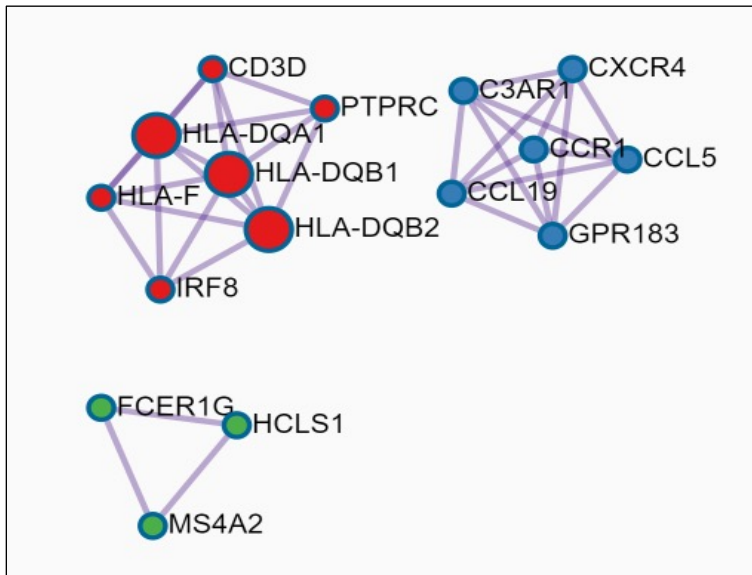

| MCODE subcluster                                                                | Upregulated GO Pathways                          | Log <sub>10</sub> P |
|---------------------------------------------------------------------------------|--------------------------------------------------|---------------------|
| <div style="color: red; font-size: 20px; text-align: center;">●</div> MCODE 1   | Phosphorylation of CD3 and TCR zeta chains       | -14.6               |
|                                                                                 | Translocation of ZAP-70 to immunological synapse | -11.4               |
|                                                                                 | Interferon gamma (IFN- $\gamma$ ) signaling      | -11.3               |
| <div style="color: blue; font-size: 20px; text-align: center;">●</div> MCODE 2  | Dendritic cell chemotaxis                        | -15.6               |
|                                                                                 | Dendritic cell migration                         | -14.8               |
|                                                                                 | Regulation of chemotaxis                         | -12.8               |
| <div style="color: green; font-size: 20px; text-align: center;">●</div> MCODE 3 | Fc epsilon receptor 1 (FCER1) pathway            | -8.1                |
