# Supplementary material
Source: PubMed Central journal article supplement (PMC9710201)

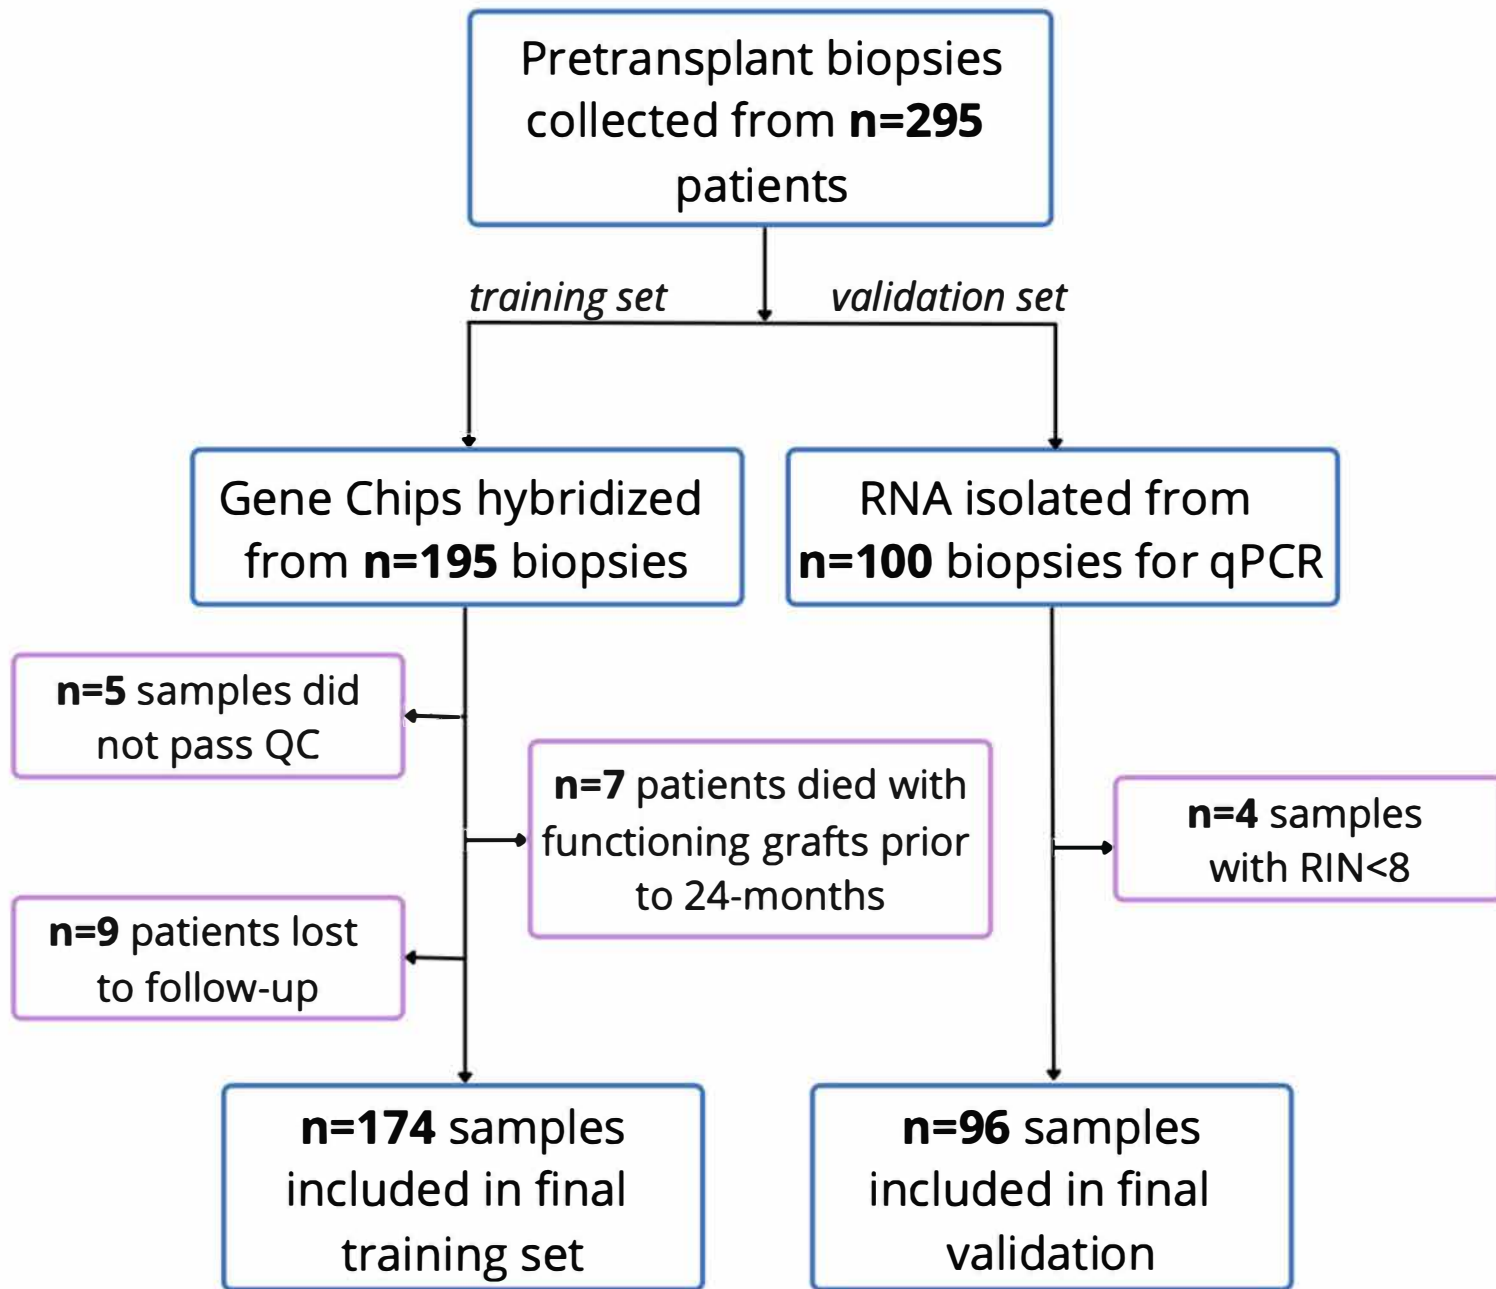

Figure S1

Supplement: NIHMS1817912-supplement-fS1.pdf [file NIHMS1817912-supplement-fS1.pdf]

# Graft/Patient Survival

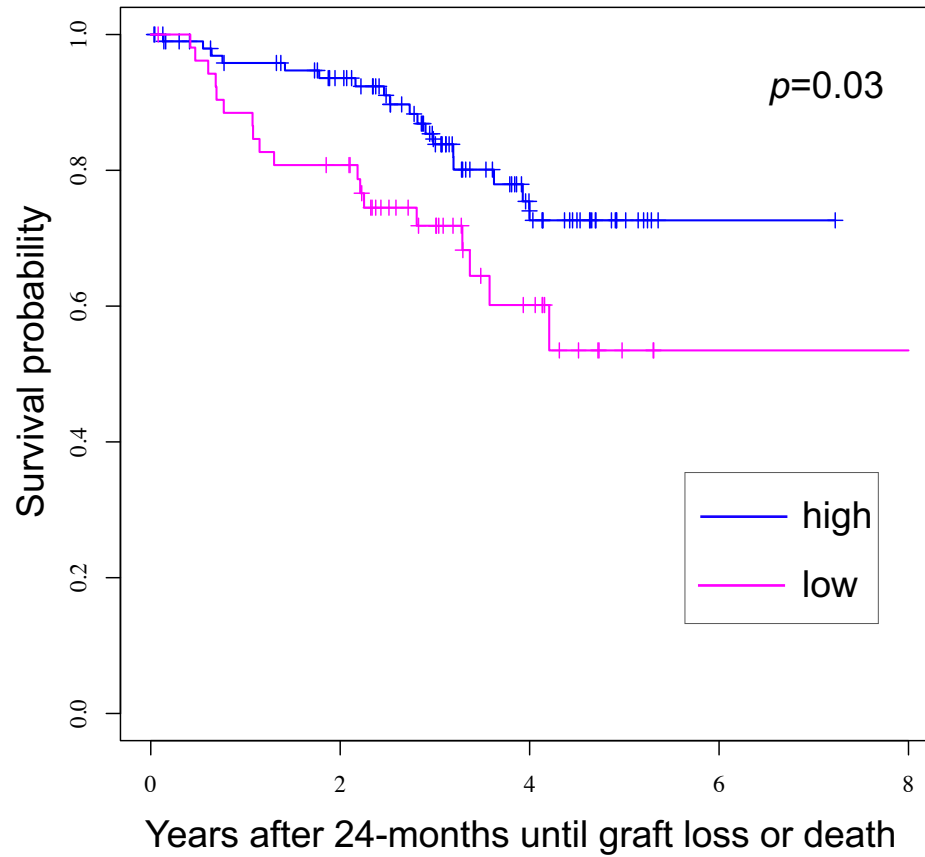

Number at risk

| Years after 24 months | 0   | 2  | 4  | 6  | 8  |
|-----------------------|-----|----|----|----|----|
| High                  | 102 | 84 | 27 | 27 | NA |
| Low                   | 53  | 43 | 15 | 9  | 1  |

Supplement: NIHMS1817912-supplement-fS3.pdf [file NIHMS1817912-supplement-fS3.pdf]

## Enriched Cell Types: Human Gene Atlas

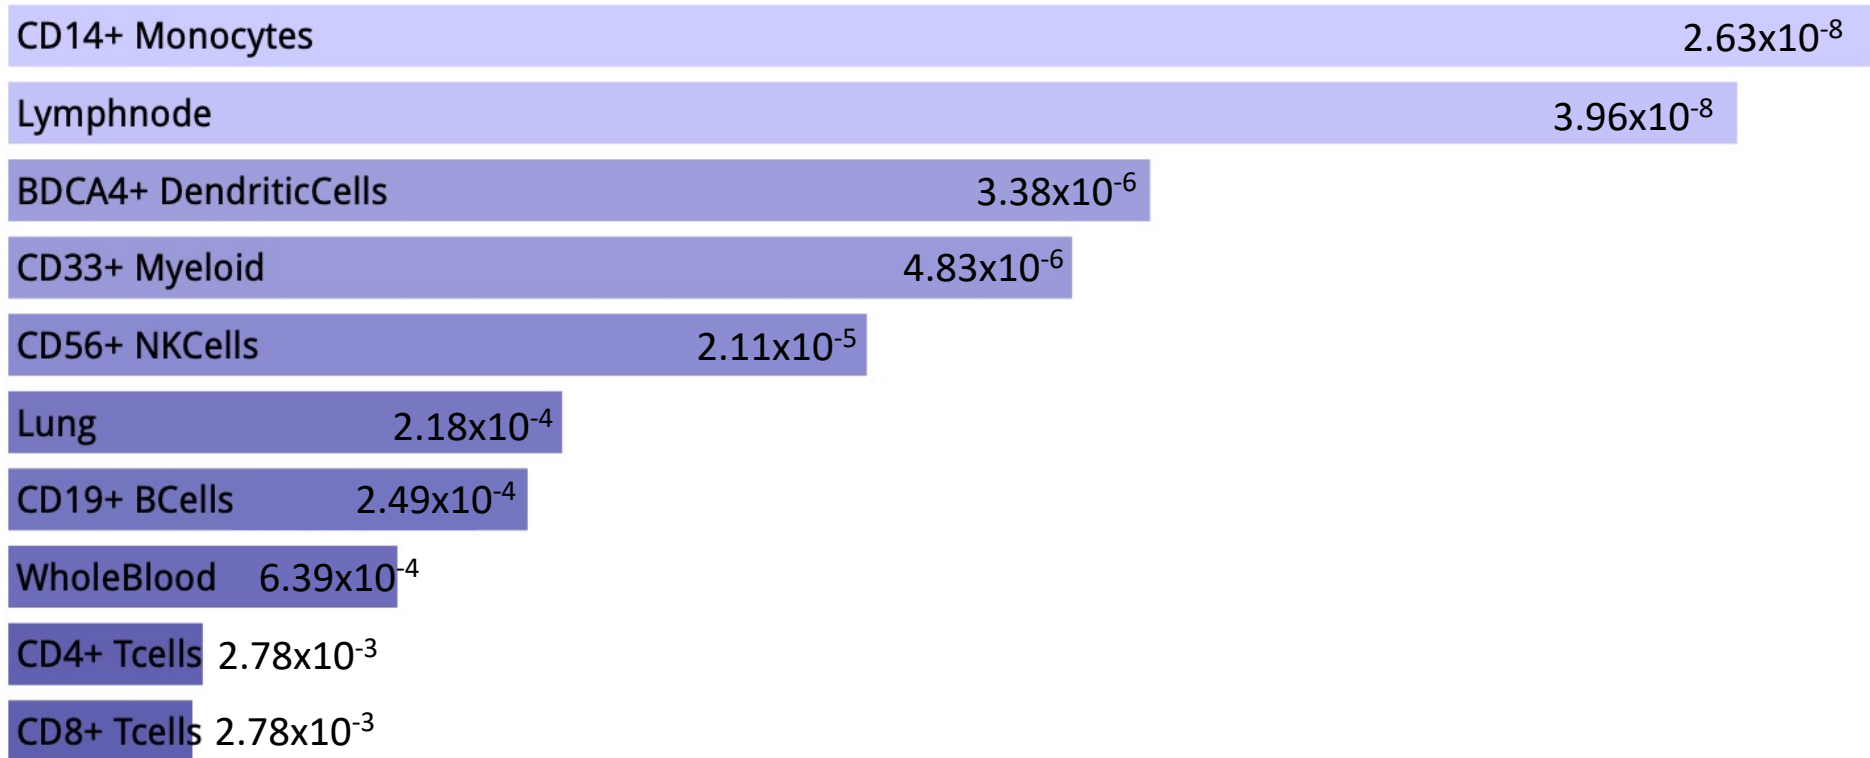

Supplement: NIHMS1817912-supplement-fS4.pdf [file NIHMS1817912-supplement-fS4.pdf]
